# Supplementary material
Source: PubMed Central journal article supplement (PMC6233795)
Supplement: jama-320-1560-s001.pdf [file jama-320-1560-s001.pdf]

## Supplementary Online Content

King WC, Hinerman AS, Belle SH, Wahed AS, Courcoulas AP. Comparison of the performance of common measures of weight regain after bariatric surgery for association with clinical outcomes. *JAMA*. doi:10.1001/jama.2018.14433

**eAppendix 1.** Formulas for weight loss and weight regain measures

**eAppendix 2.** Sensitivity analysis with multiple imputation

**eAppendix 3.** Weight regain, as percentage of maximum weight lost, and associated clinician outcomes by time since post- Roux-en-Y gastric bypass weight nadir

**eFigure 1.** Flow of participants from recruitment through follow-up

**eFigure 2.** Cumulative proportion of participants who reached weight nadir by time since Roux-en-Y gastric bypass (N=1406)

**eTable 1.** Comparisons of pre-surgery characteristics between those excluded versus included from the analysis sample

**eTable 2.** Comparisons of weight loss between those excluded versus included from the analysis sample

**eTable 3.** Weight loss at weight nadir and last study assessment among adults who underwent Roux-en-Y gastric bypass (N=1406)

**eTable 4.** Sensitivity analysis: weight regain by time since weight nadir among adults who underwent Roux-en-Y gastric bypass with imputed data

**eTable 5.** Modeled weight regain by time since weight nadir among adults who underwent Roux-en-Y gastric bypass (N=1286)

**eTable 6.** Percentage of participants who underwent Roux-en-Y gastric bypass with declines in health outcomes by time since weight nadir (N=1286)

**eTable 7.** Associations between common weight regain measures and concurrent progression of hyperlipidemia and hypertension among adults who underwent Roux-en-Y gastric bypass (N=1286)

**eTable 8.** Primary analysis versus sensitivity analysis with imputed data: associations between common weight regain measures and concurrent declines in health outcomes among adults who underwent Roux-en-Y gastric bypass

**eTable 9.** A comparison of model fits (as measured by Bayesian Information Criterion values) between models with continuous vs. dichotomous weight regain measures (N=1286)

This supplementary material has been provided by the authors to give readers additional information about their work.

## eAppendix 1. Formulas for weight loss and weight regain measures

Weight loss from surgery was calculated in kilograms (kg), i.e., (pre-surgery weight – post-surgery weight); as reduction in BMI (kg/m<sup>2</sup>), i.e., (pre-surgery BMI – post-surgery BMI); and as percentage of pre-surgery weight, i.e.,  $[100 * (\text{pre-surgery weight} - \text{post-surgery weight}) / \text{pre-surgery weight}]^1$ .

*Weight regain definitions.* Weight regain was calculated using five common equations: as increase in kg, i.e., (post-nadir weight – nadir weight)<sup>2-5</sup>; as increase in BMI (kg/m<sup>2</sup>), i.e., (post-nadir BMI – nadir BMI)<sup>6,7</sup>; as percentage of pre-surgery weight, i.e.,  $[100 * (\text{post-nadir weight} - \text{nadir weight}) / \text{pre-surgery weight}]^{8-14}$ ; as percentage of weight nadir, i.e.,  $[100 * (\text{post-nadir weight} - \text{nadir weight}) / \text{nadir weight}]^{15-20}$ ; and as percentage of maximum weight lost, i.e.,  $[100 * (\text{post-nadir weight} - \text{nadir weight}) / (\text{pre-surgery weight} - \text{nadir weight})]^{21-23}$ .

### References

1. Brethauer SA, Kim J, el Chaar M, et al. Standardized outcomes reporting in metabolic and bariatric surgery. *Surg Obes Relat Dis*. 2015;11(3):489-506.
2. Felsenreich DM, Langer FB, Kefurt R, et al. Weight loss, weight regain, and conversions to Roux-en-Y gastric bypass: 10-year results of laparoscopic sleeve gastrectomy. *Surg Obes Relat Dis*. 2016;12(9):1655-1662.
3. Flolo TN, Andersen JR, Kolotkin RL, et al. Five-Year Outcomes After Vertical Sleeve Gastrectomy for Severe Obesity: A Prospective Cohort Study. *Obes Surg*. 2017;27(8):1944–1951.
4. Abdallah E, El Nakeeb A, Youssef T, et al. Impact of extent of antral resection on surgical outcomes of sleeve gastrectomy for morbid obesity (a prospective randomized study). *Obes Surg*. 2014;24(10):1587-1594.
5. Obeidat F, Shanti H, Mismar A, Albsoul N, Al-Qudah M. The Magnitude of Antral Resection in Laparoscopic Sleeve Gastrectomy and its Relationship to Excess Weight Loss. *Obes Surg*. 2015;25(10):1928-1932.
6. Christou NV, Look D, Maclean LD. Weight gain after short- and long-limb gastric bypass in patients followed for longer than 10 years. *Ann Surg*. 2006;244(5):734-740.
7. Heneghan HM, Yimcharoen P, Brethauer SA, Kroh M, Chand B. Influence of pouch and stoma size on weight loss after gastric bypass. *Surg Obes Relat Dis*. 2012;8(4):408-415.
8. Adams TD, Davidson LE, Litwin SE, et al. Health benefits of gastric bypass surgery after 6 years. *JAMA*. 2012;308(11):1122-1131.
9. Crawford D, Jeffery RW, French SA. Can anyone successfully control their weight? Findings of a three year community-based study of men and women. *Int J Obes Relat Metab Disord*. 2000;24(9):1107-1110.
10. Field AE, Wing RR, Manson JE, Spiegelman DL, Willett WC. Relationship of a large weight loss to long-term weight change among young and middle-aged US women. *Int J Obes Relat Metab Disord*. 2001;25(8):1113-1121.
11. Lowe MR, Miller-Kovach K, Phelan S. Weight-loss maintenance in overweight individuals one to five years following successful completion of a commercial weight loss program. *Int J Obes Relat Metab Disord*. 2001;25(3):325-331.
12. McGuire MT, Wing RR, Klem ML, Lang W, Hill JO. What predicts weight regain in a group of successful weight losers? *J Consult Clin Psychol*. 1999;67(2):177-185.

13. Mogul HR, Peterson SJ, Weinstein BI, Li J, Southren AL. Long-term (2-4 year) weight reduction with metformin plus carbohydrate-modified diet in euglycemic, hyperinsulinemic, midlife women (Syndrome W). *Heart Dis.* 2003;5(6):384-392.
14. Moore LL, Vioni AJ, Wilson PW, D'Agostino RB, Finkle WD, Ellison RC. Can sustained weight loss in overweight individuals reduce the risk of diabetes mellitus? *Epidemiology.* 2000;11(3):269-273.
15. da Silva FB, Gomes DL, de Carvalho KM. Poor diet quality and postoperative time are independent risk factors for weight regain after Roux-en-Y gastric bypass. *Nutrition.* 2016;32(11-12):1250-1253.
16. Odom J, Zalesin KC, Washington TL, et al. Behavioral predictors of weight regain after bariatric surgery. *Obes Surg.* 2010;20(3):349-356.
17. Cardeal Mde A, Faria SL, Faria OP, Facundes M, Ito MK. Diet-induced thermogenesis in postoperative Roux-en-Y gastric bypass patients with weight regain. *Surg Obes Relat Dis.* 2016;12(5):1098-1107.
18. Monaco-Ferreira DV, Leandro-Merhi VA. Weight Regain 10 Years After Roux-en-Y Gastric Bypass. *Obes Surg.* 2017;27(5):1137-1144.
19. de Hollanda A, Ruiz T, Jimenez A, Flores L, Lacy A, Vidal J. Patterns of Weight Loss Response Following Gastric Bypass and Sleeve Gastrectomy. *Obes Surg.* 2015;25(7):1177-1183.
20. Livhits M, Mercado C, Yermilov I, et al. Patient behaviors associated with weight regain after laparoscopic gastric bypass. *Obes Res Clin Pract.* 2011;5(3):e169-266.
21. Yanos BR, Saules KK, Schuh LM, Sogg S. Predictors of Lowest Weight and Long-Term Weight Regain Among Roux-en-Y Gastric Bypass Patients. *Obes Surg.* 2015;25(8):1364-1370.
22. Cooper TC, Simmons EB, Webb K, Burns JL, Kushner RF. Trends in Weight Regain Following Roux-en-Y Gastric Bypass (RYGB) Bariatric Surgery. *Obes Surg.* 2015;25(8):1474-1481.
23. Abu Dayyeh BK, Lautz DB, Thompson CC. Gastrojejunal stoma diameter predicts weight regain after Roux-en-Y gastric bypass. *Clin Gastroenterol Hepatol.* 2011;9(3):228-233.

## **eAppendix 2. Sensitivity analysis with multiple imputation**

Variables measured at the pre-surgery assessment: sex (complete data, no imputation needed), race, smoking status, and diabetes status were imputed sequentially using the prior variables in this list as covariates in a logistic regression model via a full conditional specification of the distribution. Continuous longitudinal variables used to calculate weight and clinical outcomes (weight, glycated hemoglobin (HbA1c), low density lipoprotein (LDL), systolic blood pressure (SBP), diastolic blood pressure (DBP), SF-36 Mental Component Summary (MCS) score, and SF-36 Physical Component Summary (PCS) score) were imputed using a linear regression, while the longitudinal binary variables used to calculate clinical outcomes (diabetes, lipid, and hypertension medication) were imputed using a logistic regression, both in the order of assessment with prior variables sequentially appearing in these models. The order of these variables in the MI models were as follows: weight variable pre-surgery, 6 months, and so on, followed by DBP, HbA1c, LDL, diabetes medication, lipid medication, hypertension medication, SBP, SF-36 MCS score, and SF-36 PCS score, all in the order of assessment.

**eAppendix 3.** Weight regain, as percentage of maximum weight lost, and associated clinical outcomes by time since post-Roux-en-Y gastric bypass (RYGB) weight nadir

In a sample of 1406 adults, the median time to weight nadir (i.e. lowest weight) was 2.0 years (25<sup>th</sup>-75<sup>th</sup>%ile, 1.0-3.2) following RYGB. Median (25<sup>th</sup>-75<sup>th</sup>%ile) maximum weight loss was 37.4% (31.6-43.3) of pre-surgery weight. Panel A in the figure below shows the modeled mean and observed median (25<sup>th</sup>-75<sup>th</sup>%ile) of percentage of maximum weight lost that was regained, by year since post-RYGB weight nadir. The rate of weight regain was largest in the first year after weight nadir and decreased over time, but continued throughout follow-up. Panel B shows the percentage of adults with progression, or decline, of select clinical outcomes by year since weight nadir, which generally appeared to increase over time in a similar pattern. Modeled associations between weight regain and clinical outcomes is available in Table 3 and eTable 6.

A. Weight regain, as percentage of maximum weight lost

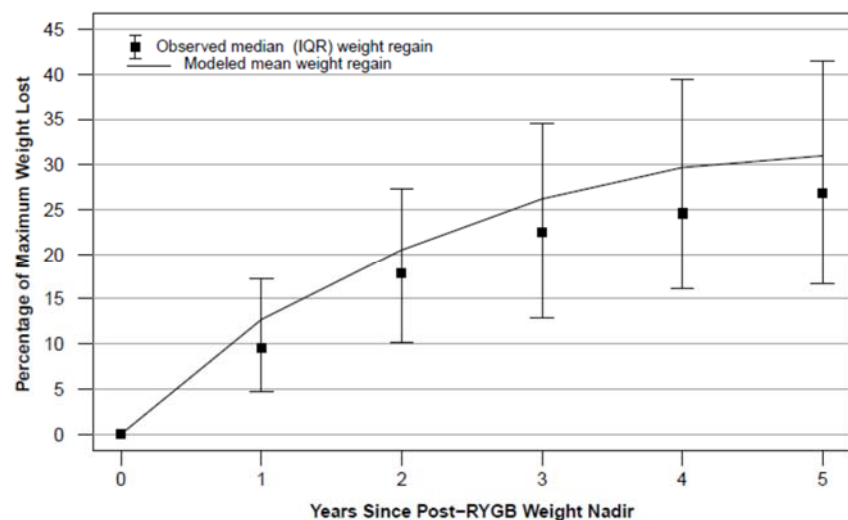

B. Clinician outcomes associated with weight regain

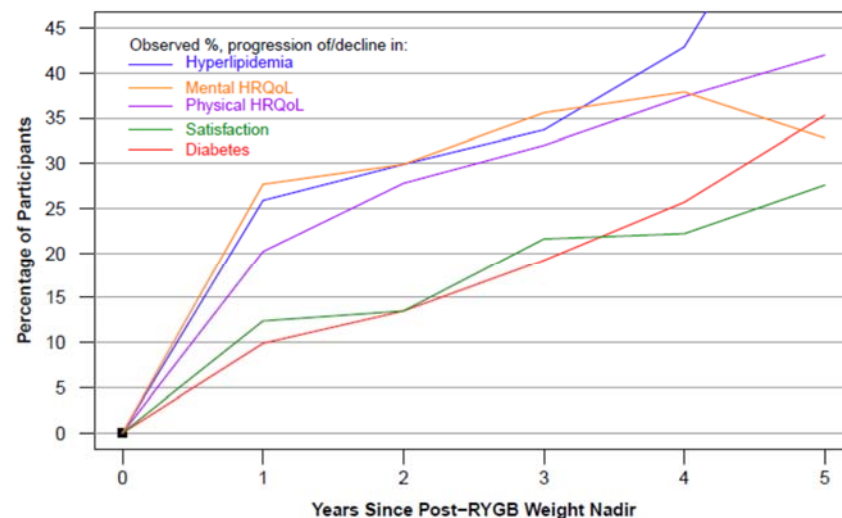

**eFigure 1.** Flow of participants from recruitment through follow-up

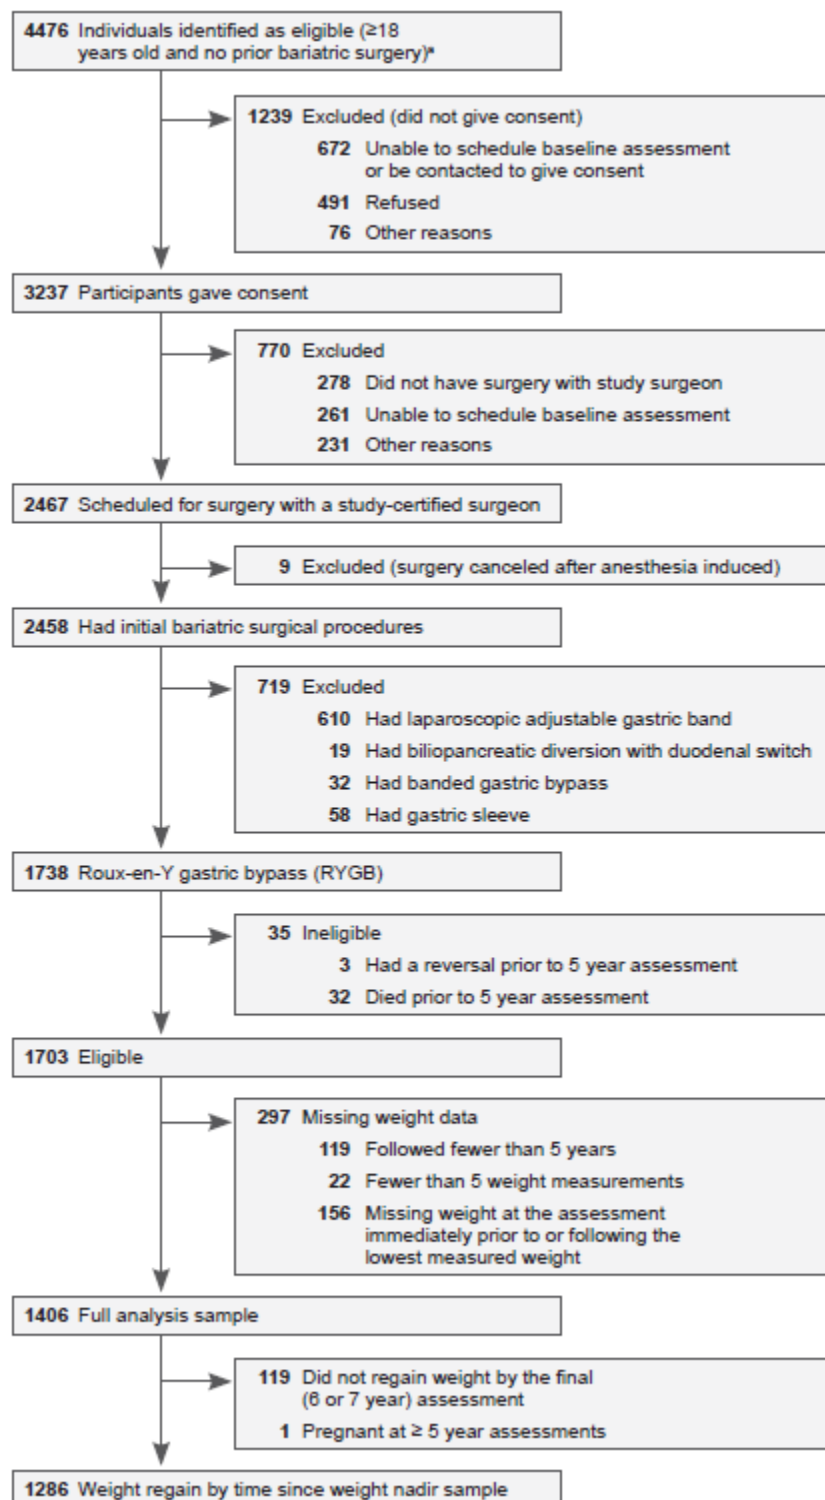

\*The number of patients screened to identify those thought to be eligible was not recorded.

**eFigure 2.** Cumulative percentage of participants who reached maximum weight loss by time since Roux-en-Y gastric bypass (n=1406)

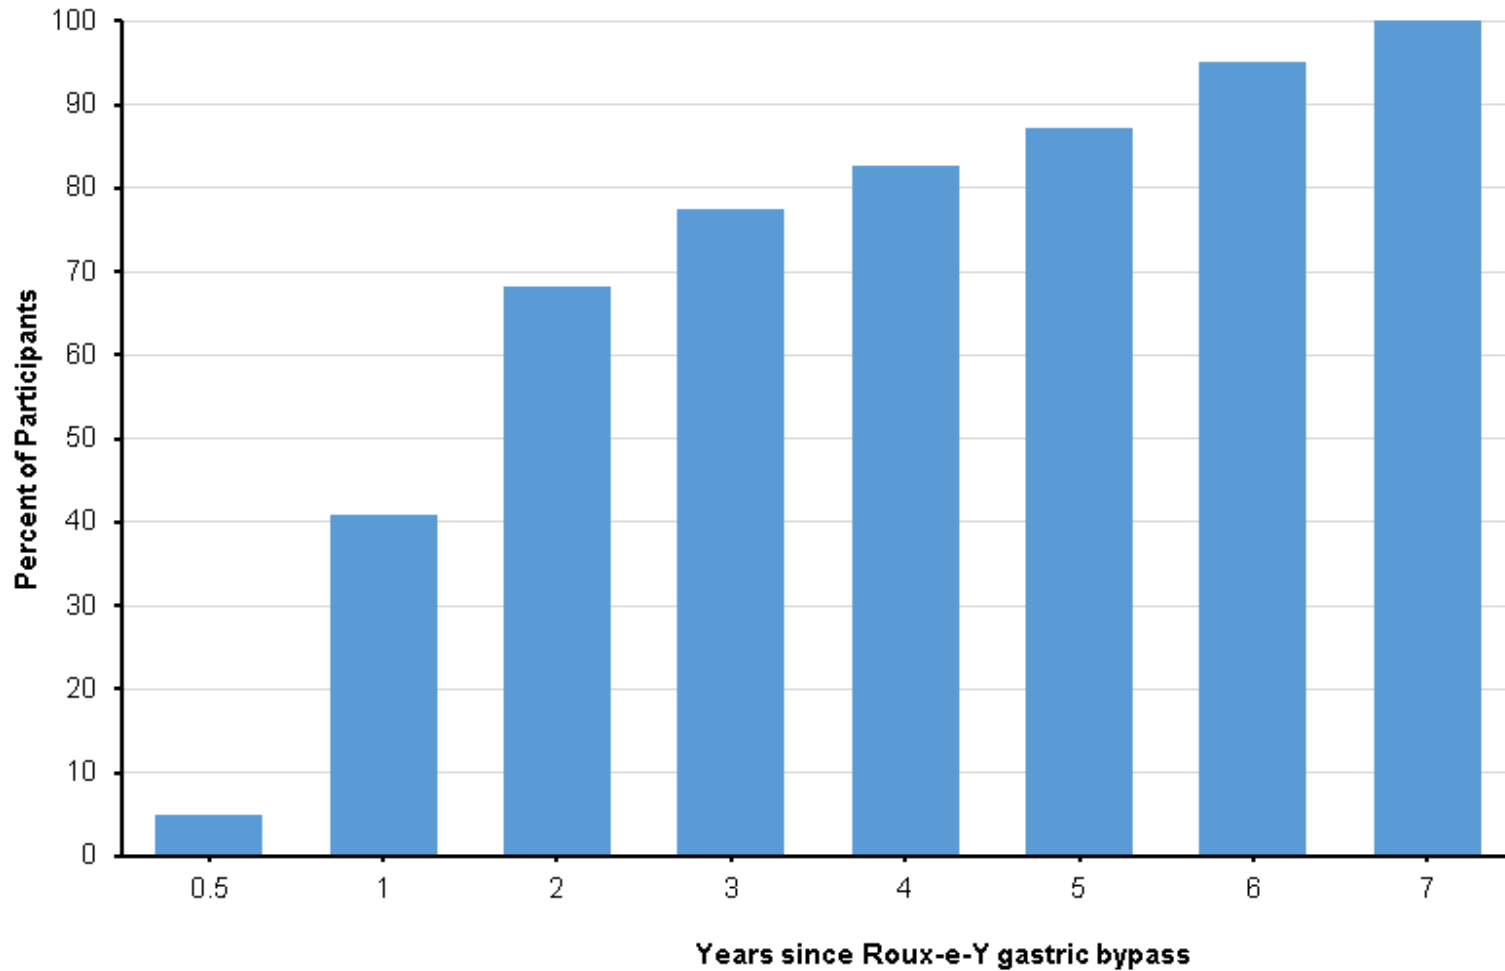

| n(%) by time maximum weight loss occurred |            |            |           |          |          |                        |                       |
|-------------------------------------------|------------|------------|-----------|----------|----------|------------------------|-----------------------|
| 71 (5.0)                                  | 505 (35.9) | 384 (27.3) | 129 (9.2) | 73 (5.2) | 64 (4.6) | 111 (7.9) <sup>a</sup> | 69 (4.9) <sup>a</sup> |

<sup>a</sup>If the lowest weight was identified in the final year of study data collection (i.e., year 6 or 7) it was considered weight nadir. Year 6 was the final assessment for n=50 who reached weight nadir at year 6. Thus, 8.4% of participants (n=119) reached weight nadir in the final year of follow-up.

**eTable 1.** Comparisons of pre-surgery characteristics between eligible participants who were excluded versus included from the analysis sample

|                                             | Excluded (N=297 <sup>a</sup> )<br>no. (%) <sup>b</sup> |              | Included (N=1406 <sup>a</sup> )<br>no. (%) <sup>b</sup> |              | P <sup>c</sup> |
|---------------------------------------------|--------------------------------------------------------|--------------|---------------------------------------------------------|--------------|----------------|
| Age, years                                  |                                                        |              |                                                         |              | <0.001         |
| Median (25th -75th %-ile)                   | 39                                                     | (33, 47)     | 47                                                      | (38, 55)     |                |
| Female                                      | 231                                                    | (77.8)       | 1129                                                    | (80.3)       | 0.33           |
| White race                                  | 242                                                    | (81.5)       | 1193                                                    | (84.9)       | 0.15           |
| Hispanic/Latino ethnicity, No./total (%)    | 22/296                                                 | (7.4)        | 61/1406                                                 | (4.3)        | 0.02           |
| Married or living as married                | 158                                                    | (53.2)       | 818                                                     | (58.2)       | 0.11           |
| Education                                   | (n=266)                                                |              | (n=1306)                                                |              | 0.46           |
| High school or less                         | 65                                                     | (24.4)       | 305                                                     | (23.4)       |                |
| Some college                                | 118                                                    | (44.4)       | 559                                                     | (42.8)       |                |
| College degree                              | 83                                                     | (31.2)       | 442                                                     | (33.8)       |                |
| Unemployed                                  | 16                                                     | (5.4)        | 50                                                      | (3.6)        | 0.14           |
| Household income, US \$                     | (n=259)                                                |              | (n=1308)                                                |              | 0.17           |
| Less than 25,000                            | 53                                                     | (20.5)       | 243                                                     | (19.1)       |                |
| 25,000-49,999                               | 75                                                     | (29.0)       | 357                                                     | (28.1)       |                |
| 50,000-74,999                               | 67                                                     | (25.9)       | 300                                                     | (23.6)       |                |
| 75,000-99,999                               | 39                                                     | (15.1)       | 194                                                     | (15.3)       |                |
| >100,000                                    | 25                                                     | (9.7)        | 176                                                     | (13.9)       |                |
| Current or recent smoker, No./total (%)     | 60/295                                                 | (20.3)       | 183/1404                                                | (13.0)       | 0.001          |
| Body mass index, kg/m <sup>2</sup>          |                                                        |              |                                                         |              | 0.07           |
| Median (25th -75th %-ile)                   | 47.6                                                   | (43.1, 52.0) | 46.3                                                    | (42.3, 51.8) |                |
| Diabetes                                    | 89/282                                                 | (31.6)       | 480/1333                                                | (36.0)       | 0.16           |
| Hyperlipidemia                              | 63/244                                                 | (25.8)       | 438/1132                                                | (38.7)       | <0.001         |
| Hypertension                                | 184/287                                                | (64.1)       | 950/1361                                                | (69.8)       | 0.059          |
| SF-36 Physical component score <sup>d</sup> | (n=257)                                                |              | (n=1287)                                                |              | <0.001         |
| Median (25th -75th %-ile)                   | 38.5                                                   | (30.0, 46.4) | 35.1                                                    | (26.7, 43.9) | <0.001         |
| SF-36 Mental component score <sup>d</sup>   | (n=257)                                                |              | (n=1287)                                                |              | 0.91           |
| Median (25th -75th %-ile)                   | 51.7                                                   | (42.8, 57.6) | 51.6                                                    | (42.8, 57.2) |                |

Abbreviations: SF-36, Short-Form 36-item Health Survey

<sup>a</sup>Denominators shift between variables due to missing data.

<sup>b</sup>Data are reported as No. (%) unless otherwise indicated.

<sup>c</sup>The Pearson chi square test or Fisher's exact test for categorical variables, the Cochran-Armitage test for ordinal variables, and the Wilcoxon rank sum test for continuous variables

<sup>d</sup>Norm-based methods transform the SF-36 scores to a mean of 50 and standard deviations of 10 in the general U.S. population (range 0-100). Lower scores imply more disability/worse function.



**eTable 2.** Comparison of weight loss between eligible participants who were excluded versus included from the analysis sample

|                             | Time since Roux-en-Y gastric bypass |                      |                     |                     |                     |                     |                     |                     | P value <sup>b</sup> |
|-----------------------------|-------------------------------------|----------------------|---------------------|---------------------|---------------------|---------------------|---------------------|---------------------|----------------------|
|                             | 6 month                             | Year 1               | Year 2              | Year 3              | Year 4              | Year 5              | Year 6              | Year 7              |                      |
|                             | <b>Observed Median (IQR)</b>        |                      |                     |                     |                     |                     |                     |                     | .65                  |
| <b>Excluded<sup>a</sup></b> | (n=231)                             | (n=216)              | (n=160)             | (n=163)             | (n=158)             | (n=127)             | (n=137)             | (n=103)             |                      |
| <b>(N=297)</b>              | 27.3<br>(23.4-31.7)                 | 34.34<br>(29.5-39.9) | 35.3<br>(28.3-42.4) | 32.0<br>(22.7-39.1) | 28.7<br>(21.5-36.8) | 28.1<br>(21.1-36.1) | 28.5<br>(22.1-37.5) | 25.2<br>(19.3-33.7) |                      |
| <b>Included</b>             | (n=1378)                            | (n=1383)             | (n=1384)            | (n=1355)            | (n=1346)            | (n=1349)            | (n=1329)            | (n=881)             |                      |
| <b>(N=1406)</b>             | 27.0<br>(23.0-30.8)                 | 34.0<br>(28.4-39.2)  | 34.0<br>(27.5-40.1) | 31.5<br>(24.9-38.3) | 29.6<br>(22.7-36.9) | 28.9<br>(21.7-36.0) | 29.2<br>(21.8-36.4) | 28.0<br>(20.4-35.5) |                      |

Abbreviations: IQR, interquartile range

<sup>a</sup>Participants were excluded from the analysis sample if they had inadequate weight assessments (i.e. fewer than 5 post-surgery weight assessments, no weight assessment  $\geq$  year 5 or missing the weight prior to or following the lowest measured weight).

<sup>b</sup>From a linear mixed model via maximum likelihood with a person-level random intercept, with sample designation as a discrete fixed effect and time since surgery as a continuous fixed effect, controlling for pre-surgery factors related to missing follow-up data (i.e., site, age, smoking).

**eTable 3.** Weight loss at post-surgery weight nadir and last study assessment<sup>a</sup> among adults who underwent Roux-en-Y gastric bypass (N=1406)

|                                               | Timing                    |             |                              |             | Last assessment, by year since surgery <sup>c</sup> |             |        |             |        |             |
|-----------------------------------------------|---------------------------|-------------|------------------------------|-------------|-----------------------------------------------------|-------------|--------|-------------|--------|-------------|
|                                               | Weight Nadir <sup>a</sup> |             | Last Assessment <sup>b</sup> |             | Year 5                                              |             | Year 6 |             | Year 7 |             |
|                                               |                           |             |                              |             | n=54                                                |             | n=475  |             | n=876  |             |
| <b>Weight loss, Median (25th -75th %-ile)</b> |                           |             |                              |             |                                                     |             |        |             |        |             |
| Weight, kg                                    | 48.1                      | (39.9-59.0) | 35.8                         | (26.8-47.6) | 36.5                                                | (28.6-47.6) | 36.7   | (27.2-47.6) | 35.8   | (26.3-47.2) |
| Body mass index, kg/m <sup>2</sup>            | 17.4                      | (14.3-21.0) | 12.9                         | (9.5-16.9)  | 13.1                                                | (9.0-17.1)  | 12.9   | (9.7-17.0)  | 12.9   | (9.3-16.8)  |
| Percentage of pre-surgery weight              | 37.4                      | (31.6-43.3) | 28.0                         | (20.6-35.6) | 28.9                                                | (18.1-34.3) | 27.9   | (20.8-35.9) | 28.0   | (20.3-35.5) |
| <b>Weight loss thresholds, No. (%)</b>        |                           |             |                              |             |                                                     |             |        |             |        |             |
| ≥10% of pre-surgery weight                    | 1405                      | (99.9)      | 1345                         | (95.7)      | 52                                                  | (96.3)      | 457    | (96.2)      | 836    | (95.4)      |
| ≥25% of pre-surgery weight                    | 1304                      | (92.8)      | 857                          | (61.0)      | 34                                                  | (63.0)      | 288    | (60.6)      | 535    | (61.1)      |

<sup>a</sup>Participants post-surgery weight nadir occurred a median of 2.0 years (25<sup>th</sup>-75<sup>th</sup> %-ile: 1.0-3.2) post-surgery.

<sup>b</sup>Participants last assessment occurred a median (25<sup>th</sup>-75<sup>th</sup> %-ile)= 6.6 (5.9-7.0) years. One participant who was pregnant during all non-missing weight assessments in years 5-7 is excluded from the last assessment column.

<sup>c</sup>Values stratified by the timing of participants' last assessment (i.e. year 5, 6 or 7 post-surgery).

**eTable 4.** Modeled weight regain by time since post-surgery weight nadir among adults who underwent Roux-en-Y gastric bypass (N=1286)

|                                                               | Years since weight nadir |             |         |             |         |             |         |             |         |             |
|---------------------------------------------------------------|--------------------------|-------------|---------|-------------|---------|-------------|---------|-------------|---------|-------------|
|                                                               | 1 Year                   |             | 2 Years |             | 3 Years |             | 4 Years |             | 5 Years |             |
| <b>Weight regain, Modeled mean (95% CI)<sup>a</sup></b>       |                          |             |         |             |         |             |         |             |         |             |
| Weight, kg                                                    | 6.3                      | (5.9-6.5)   | 9.8     | (9.5-9.9)   | 12.4    | (12.2-12.6) | 14.2    | (13.9-14.4) | 15.0    | (14.5-15.5) |
| BMI, kg/m <sup>2</sup>                                        | 2.2                      | (2.1-2.3)   | 3.5     | (3.4-3.6)   | 4.4     | (4.3-4.5)   | 5.0     | (4.9-5.1)   | 5.3     | (5.2-5.5)   |
| % of pre-surgery weight                                       | 4.6                      | (4.4-4.8)   | 7.2     | (7.1-7.4)   | 9.2     | (9.0-9.4)   | 10.5    | (10.3-10.7) | 11.1    | (10.8-11.4) |
| % of weight nadir                                             | 7.7                      | (7.3-8.0)   | 11.9    | (11.6-12.1) | 15.1    | (14.8-15.3) | 17.2    | (16.9-17.5) | 18.3    | (17.7-18.8) |
| % of max weight lost                                          | 12.6                     | (12.0-13.2) | 20.4    | (20.1-20.9) | 26.1    | (25.8-26.7) | 29.6    | (29.2-30.2) | 30.9    | (30.0-31.9) |
| <b>Clinically important weight Regain, Modeled % (95% CI)</b> |                          |             |         |             |         |             |         |             |         |             |
| ≥10 kg                                                        | 17.0                     | (14.4-17.5) | 37.3    | (35.5-38.4) | 54.1    | (52.2-55.5) | 62.6    | (60.9-64.1) | 63.1    | (59.8-65.7) |
| ≥5 kg/m <sup>2</sup> BMI points                               | 7.6                      | (6.0-8.1)   | 20.3    | (18.8-21.2) | 34.5    | (32.7-36.0) | 44.0    | (42.3-45.8) | 46.5    | (43.4-49.9) |
| ≥10% of pre-surgery weight                                    | 8.1                      | (6.6-8.9)   | 22.3    | (20.9-23.5) | 37.8    | (36.2-39.6) | 47.8    | (46.3-49.9) | 50.0    | (47.2-53.3) |
| ≥10% of nadir weight                                          | 24.2                     | (21.6-25.3) | 49.0    | (47.5-50.8) | 66.2    | (64.8-68.0) | 73.7    | (72.8-75.4) | 73.7    | (71.6-76.5) |
| ≥15% of nadir weight                                          | 10.5                     | (8.7-11.1)  | 26.7    | (25.1-27.7) | 42.5    | (40.9-44.2) | 51.6    | (50.3-53.4) | 52.6    | (49.8-55.8) |
| ≥10% of max weight lost                                       | 49.5                     | (47.4-51.8) | 73.9    | (72.8-75.6) | 84.7    | (83.9-86.4) | 87.9    | (87.2-89.3) | 86.3    | (84.5-88.6) |
| ≥20% of max weight lost                                       | 19.7                     | (17.5-20.7) | 40.9    | (39.5-42.4) | 57.5    | (56.3-59.7) | 65.9    | (64.9-68.0) | 66.8    | (64.4-70.4) |
| ≥25% of max weight lost                                       | 12.5                     | (10.6-13.2) | 28.6    | (27.0-29.5) | 43.5    | (41.5-45.2) | 52.5    | (50.8-54.3) | 54.1    | (51.0-57.3) |

Abbreviations: BMI, body mass index; max, maximum.

<sup>a</sup>Based on linear mixed models using maximum likelihood with a person-level random intercept, and time since post-surgery weight nadir (entered as linear and quadratic terms) as a continuous fixed effects, controlling for pre-surgery factors related to missing follow-up data (i.e., site, pre-surgery age and pre-surgery smoking status). The quadratic term for time since weight nadir was significant ( $P<0.01$ ) in all models.

**eTable 5.** Sensitivity analysis: weight regain by time since weight nadir among adults who underwent Roux-en-Y gastric bypass with imputed data<sup>a</sup>

|                                                                       | Years since weight nadir |            |         |             |         |             |         |             |         |             |
|-----------------------------------------------------------------------|--------------------------|------------|---------|-------------|---------|-------------|---------|-------------|---------|-------------|
|                                                                       | 1 Year                   |            | 2 Years |             | 3 Years |             | 4 Years |             | 5 Years |             |
| <b>Timing, median (25<sup>th</sup> -75<sup>th</sup> %-ile)</b>        |                          |            |         |             |         |             |         |             |         |             |
| Years since initial surgery                                           | 3.0                      | (2.1-4.1)  | 3.9     | (3.0-4.4)   | 4.8     | (4.0-5.2)   | 5.4     | (5.0-6.0)   | 6.1     | (5.8-7.0)   |
| <b>Weight regain, median (25<sup>th</sup> -75<sup>th</sup> %-ile)</b> |                          |            |         |             |         |             |         |             |         |             |
| Weight, kg                                                            | 5.0                      | (2.3-8.6)  | 8.9     | (5.0-14.0)  | 11.4    | (6.4-17.4)  | 12.4    | (7.5-19.6)  | 13.1    | (7.8-20.2)  |
| BMI, kg/m <sup>2</sup>                                                | 1.8                      | (0.9-3.1)  | 3.2     | (1.8-4.9)   | 4.1     | (2.3-6.2)   | 4.4     | (2.7-7.0)   | 4.6     | (2.8-7.1)   |
| % of pre-surgery weight                                               | 3.9                      | (1.8-6.6)  | 6.8     | (3.9-10.2)  | 8.4     | (5.0-12.9)  | 9.4     | (5.9-14.5)  | 10.0    | (6.2-14.7)  |
| % of nadir weight                                                     | 6.2                      | (2.9-10.5) | 10.7    | (6.4-16.9)  | 13.7    | (7.8-20.8)  | 15.1    | (9.1-23.3)  | 15.3    | (9.5-23.7)  |
| % of max weight lost                                                  | 10.3                     | (5.0-18.1) | 18.6    | (10.5-28.7) | 24.0    | (13.9-35.9) | 26.1    | (16.8-40.5) | 27.9    | (17.1-42.8) |
| <b>Clinically important weight regain<sup>b</sup>, No. (%)</b>        |                          |            |         |             |         |             |         |             |         |             |
| ≥10 kg                                                                | 297                      | (19.1)     | 610     | (42.5)      | 747     | (55.2)      | 743     | (60.5)      | 601     | (63.5)      |
| ≥ 5 BMI points                                                        | 135                      | (8.7)      | 342     | (23.9)      | 506     | (37.4)      | 521     | (42.4)      | 432     | (45.6)      |
| ≥10% of pre-surgery weight                                            | 152                      | (9.8)      | 382     | (26.7)      | 552     | (40.8)      | 575     | (46.8)      | 478     | (50.5)      |
| ≥10% of nadir weight                                                  | 426                      | (27.5)     | 773     | (53.9)      | 897     | (66.3)      | 878     | (71.5)      | 697     | (73.6)      |
| ≥15% of nadir weight                                                  | 195                      | (12.6)     | 458     | (31.9)      | 592     | (43.8)      | 619     | (50.4)      | 495     | (52.3)      |
| ≥10% of max weight lost                                               | 791                      | (51.0)     | 1102    | (76.9)      | 1141    | (84.3)      | 1079    | (87.8)      | 826     | (87.3)      |
| ≥20% of max weight lost                                               | 326                      | (21.0)     | 658     | (45.9)      | 804     | (59.4)      | 806     | (65.7)      | 652     | (68.9)      |
| ≥25% of max weight lost                                               | 207                      | (13.4)     | 469     | (32.7)      | 639     | (47.2)      | 640     | (52.1)      | 541     | (57.1)      |

Abbreviations: BMI, body mass index; max, maximum.

<sup>a</sup>See eAppendix 2 for a description of the imputation process. Of 1703 participants, a minimum of 137 and maximum of 158 participants who reached weight nadir during the final year of data collection in the 20 imputed datasets were excluded.

**eTable 6.** Percentage of participants who underwent Roux-en-Y gastric bypass<sup>a</sup> with declines in health by time since post-surgery weight nadir (N=1286<sup>a</sup>)

|                                                | Time since weight nadir <sup>b</sup> |              |              |              |              |
|------------------------------------------------|--------------------------------------|--------------|--------------|--------------|--------------|
|                                                | Year 1                               | 2 Years      | 3 Years      | 4 Years      | 5 Years      |
|                                                | n, no.(%)                            |              |              |              |              |
| Progression of disease:                        |                                      |              |              |              |              |
| Diabetes (n=689) <sup>c</sup>                  | n=555                                | n=518        | n=458        | n=304        | n=153        |
|                                                | 55   (9.9)                           | 70   (13.5)  | 88   (19.2)  | 78   (25.7)  | 54   (35.3)  |
| Hyperlipidemia (n=539) <sup>d</sup>            | n=414                                | n=388        | n=341        | n=224        | n=114        |
|                                                | 107   (25.9)                         | 116   (29.9) | 115   (33.7) | 96   (42.9)  | 78   (68.4)  |
| Hypertension (n=956) <sup>e</sup>              | n=822                                | n=758        | n=694        | n=469        | n=263        |
|                                                | 380   (46.2)                         | 408   (53.8) | 408   (58.8) | 288   (61.4) | 188   (71.5) |
| Clinically important decline:                  |                                      |              |              |              |              |
| Physical HRQoL (n=903) <sup>f</sup>            | n=712                                | n=663        | n=590        | n=364        | n=174        |
|                                                | 144   (20.2)                         | 184   (27.8) | 189   (32.0) | 136   (37.4) | 73   (42.0)  |
| Mental HRQoL (n=903) <sup>g</sup>              | n=712                                | n=663        | n=590        | n=364        | n=174        |
|                                                | 197   (27.7)                         | 198   (29.9) | 210   (35.6) | 138   (37.9) | 57   (32.8)  |
| Satisfaction with surgery <sup>h</sup> (n=272) | n =218                               | n =200       | n =139       | n =36        | n =29        |
|                                                | 27   (12.4)                          | 27   (13.5)  | 30   (21.6)  | 8   (22.2)   | 8   (27.6)   |

Abbreviations: HRQoL, health-related quality of life

<sup>a</sup>Participants who reached weight nadir during the final year of data collection (n=119) or did not complete the required measure(s) for an outcome at the time of maximum weight loss and at least one later assessment (diabetes n=597, hyperlipidemia n=747, hypertension n=330, physical and mental HRQoL n=383; satisfaction n=1014) were excluded from this table because change from weight nadir could not be determined. 615 of 1014 participants missing satisfaction experienced weight nadir prior to the addition of this item to the study protocol in 2010. Participants were excluded from specific time points if the data was not collected (i.e., diabetes, hyperlipidemia and hypertension were not collected at the year 6 assessment), if they were due for assessment after study data collection ended, if they were pregnant, or if they missed an assessment.

<sup>b</sup>Poisson mixed models with robust error variance were used to test associations with the continuous fixed effect of time since weight nadir. Both a linear and quadratic term were considered. In all models, the linear term was significant ( $P<0.05$ ); the quadratic term for time was not ( $P>0.05$ ).

<sup>c</sup>Diabetes: a change from not taking diabetes medication to taking diabetes medication, change from not taking insulin to taking insulin, or an increase of glycated hemoglobin (HbA1c) by at least 0.5% plus a post-weight nadir value of 5.7% or greater.

<sup>d</sup>Hyperlipidemia: a change from not taking lipid lowering medication to taking lipid lowering medication, an increase of low-density lipoprotein (LDL) by at least 10 mg/dL plus a post-weight nadir value of 100 mg/dL or greater.

<sup>e</sup>Hypertension: a change from not taking hypertension medication to taking hypertension medication, an increase of systolic blood pressure by at least 5 mm Hg plus a post-weight nadir value of 120 mm Hg or greater, or an increase of diastolic blood pressure (DBP) by at least 5 mm HG plus a post-weight nadir value of 80 mm Hg or greater.

<sup>f</sup>A decrease of  $\geq 5$  points on the Short-Form 36-item Health Survey Mental Component Score and Physical Component Score, respectively.

<sup>g</sup>An increase of at least 1 point to at least 3 (i.e., "somewhat satisfied" – "very dissatisfied").

**eTable 7.** Associations between common definitions of weight regain and concurrent progression of hyperlipidemia and hypertension, respectively, among adults who underwent Roux-en-Y gastric bypass (N=1286)

|                                                       | Progression of hyperlipidemia <sup>a</sup><br>N=539 |             |         |                  | Progression of hypertension <sup>b</sup><br>N=956 |             |         |                  |
|-------------------------------------------------------|-----------------------------------------------------|-------------|---------|------------------|---------------------------------------------------|-------------|---------|------------------|
|                                                       | RR <sup>c</sup>                                     | (95% CI)    | P value | BIC <sup>d</sup> | RR <sup>c</sup>                                   | (95% CI)    | P value | BIC <sup>d</sup> |
| <b>Weight regain, continuous<sup>e</sup></b>          |                                                     |             |         |                  |                                                   |             |         |                  |
| Weight in kg, per 9.1 kg <sup>b</sup>                 | 1.14                                                | (1.00-1.29) | .045    | 2050.9           | 1.10                                              | (1.05-1.16) | <.001   | 5631.9           |
| BMI (kg/m <sup>2</sup> ), per 3.2 kg/m <sup>2b</sup>  | 1.14                                                | (1.00-1.28) | .043    | 2050.8           | 1.10                                              | (1.05-1.16) | <.001   | 5632.1           |
| % pre-surgery weight, per 6.9% <sup>b</sup>           | 1.13                                                | (0.99-1.29) | .07     | 2051.7           | 1.12                                              | (1.06-1.18) | <.001   | 5630.8           |
| % nadir weight, per 11.0% <sup>b</sup>                | 1.12                                                | (0.99-1.26) | .07     | 2051.5           | 1.09                                              | (1.04-1.15) | <.001   | 5634.9           |
| % max weight lost, per 18.9% <sup>b</sup>             | 1.11                                                | (0.97-1.27) | .14     | 2052.8           | 1.13                                              | (1.07-1.19) | <.001   | 5627.9           |
| <b>Clinically important weight regain<sup>f</sup></b> |                                                     |             |         |                  |                                                   |             |         |                  |
| ≥10 kg                                                | 1.30                                                | (1.05-1.61) | .02     | 2049.4           | 1.18                                              | (1.06-1.30) | 0.002   | 5636.3           |
| ≥ 5 BMI points (kg/m <sup>2</sup> )                   | 1.22                                                | (0.97-1.55) | .09     | 2052.4           | 1.17                                              | (1.05-1.30) | 0.004   | 5637.8           |
| ≥10% of pre-surgery weight                            | 1.23                                                | (0.98-1.54) | .08     | 2052.2           | 1.18                                              | (1.06-1.31) | 0.002   | 5636.8           |
| ≥10% of nadir weight                                  | 1.14                                                | (0.92-1.42) | .22     | 2053.5           | 1.19                                              | (1.07-1.32) | 0.001   | 5635.2           |
| ≥15% of nadir weight                                  | 1.22                                                | (0.98-1.53) | .07     | 2052.0           | 1.16                                              | (1.04-1.28) | 0.006   | 5638.4           |
| ≥10% of max weight lost                               | 1.12                                                | (0.88-1.43) | .34     | 2054.9           | 1.26                                              | (1.11-1.43) | <.001   | 5631.8           |
| ≥20% of max weight lost                               | 1.27                                                | (1.02-1.57) | .03     | 2050.6           | 1.20                                              | (1.08-1.33) | <.001   | 5634.1           |
| ≥25% of max weight lost                               | 1.22                                                | (0.98-1.51) | .07     | 2052.1           | 1.20                                              | (1.08-1.33) | <.001   | 5634.1           |

Abbreviations: BIC=Bayesian Information Criterion; max=maximum.

<sup>a</sup>A change from not taking lipid lowering medication to taking lipid lowering medication, an increase of low-density lipoprotein (LDL) by at least 10 mg/dL plus a post-weight nadir value of 100 mg/dL or greater.

<sup>b</sup>A change from not taking hypertension medication to taking hypertension medication, an increase of systolic blood pressure (SBP) by at least 5 mm Hg plus a post-weight nadir value of 120 mm Hg or greater, or an increase of diastolic blood pressure (DBP) by at least 5 mm HG plus a post-weight nadir value of 80 mm Hg or greater.

<sup>c</sup>Adjusted for pre-surgery factors related to missing data (i.e., site, age and smoking status), LDL or SBP and DBP, at time of weight loss nadir, respectively, and time since weight nadir entered as a continuous fixed effect (only linear term retained).

<sup>d</sup>Given equivalent model complexities, a difference of more than 2 is considered good evidence that the model with the lower BIC has better fit.

<sup>e</sup>Relative risk is reported per median weight regain across post-nadir time points.

<sup>f</sup>As previously defined in the scientific literature.

**eTable 8.** Sensitivity analysis with imputed data versus primary analysis: Associations between common weight regain measures and concurrent declines in health outcomes among adults who underwent Roux-en-Y gastric bypass

|                                              | Progression of diabetes                               |                    |                      |                    | Progression of hyperlipidemia                       |                    |                      |                    | Progression of hypertension |                    |                      |                    |
|----------------------------------------------|-------------------------------------------------------|--------------------|----------------------|--------------------|-----------------------------------------------------|--------------------|----------------------|--------------------|-----------------------------|--------------------|----------------------|--------------------|
|                                              | Primary analysis                                      |                    | Sensitivity analysis |                    | Primary analysis                                    |                    | Sensitivity analysis |                    | Primary analysis            |                    | Sensitivity analysis |                    |
|                                              | RR <sup>a</sup>                                       | (95% CI)           | RR <sup>a</sup>      | (95% CI)           | RR <sup>a</sup>                                     | (95% CI)           | RR <sup>a</sup>      | (95% CI)           | RR <sup>a</sup>             | (95% CI)           | RR <sup>a</sup>      | (95% CI)           |
| <b>Weight regain, continuous<sup>b</sup></b> |                                                       |                    |                      |                    |                                                     |                    |                      |                    |                             |                    |                      |                    |
| Weight in kg, per 9.1 kg                     | 1.40                                                  | (1.18-1.67)        | 1.40                 | (1.27-1.53)        | <b>1.14</b>                                         | <b>(1.00-1.29)</b> | 1.22                 | (1.14-1.30)        | 1.10                        | (1.05-1.16)        | 1.13                 | (1.09-1.17)        |
| BMI, per 3.2 kg/m <sup>2</sup>               | 1.41                                                  | (1.19-1.68)        | 1.41                 | (1.29-1.55)        | <b>1.14</b>                                         | <b>(1.00-1.28)</b> | 1.22                 | (1.14-1.31)        | 1.10                        | (1.05-1.16)        | 1.13                 | (1.09-1.17)        |
| % pre-surgery weight, per 6.9%               | 1.45                                                  | (1.22-1.73)        | 1.44                 | (1.31-1.59)        | 1.13                                                | (0.99-1.29)        | <b>1.24</b>          | <b>(1.15-1.33)</b> | 1.12                        | (1.06-1.18)        | 1.15                 | (1.10-1.19)        |
| % nadir weight, per 11.0%                    | 1.36                                                  | (1.15-1.60)        | 1.36                 | (1.24-1.48)        | 1.12                                                | (0.99-1.26)        | 1.20                 | (1.13-1.28)        | 1.09                        | (1.04-1.15)        | 1.11                 | (1.07-1.15)        |
| % max weight lost, per 18.9%                 | <b>1.51</b>                                           | <b>(1.27-1.78)</b> | <b>1.46</b>          | <b>(1.33-1.60)</b> | 1.11                                                | (0.97-1.27)        | <b>1.24</b>          | <b>(1.15-1.34)</b> | <b>1.13</b>                 | <b>(1.07-1.19)</b> | <b>1.16</b>          | <b>(1.12-1.21)</b> |
| <b>Clinically important weight regain</b>    |                                                       |                    |                      |                    |                                                     |                    |                      |                    |                             |                    |                      |                    |
| ≥10 kg                                       | 1.56                                                  | (1.15-2.11)        | 1.75                 | (1.44-2.13)        | <b>1.30</b>                                         | <b>(1.05-1.61)</b> | 1.41                 | (1.22-1.62)        | 1.18                        | (1.06-1.30)        | 1.25                 | (1.15-1.36)        |
| ≥ 5 BMI points                               | 1.66                                                  | (1.19-2.30)        | 1.81                 | (1.50-2.19)        | 1.22                                                | (0.97-1.55)        | 1.43                 | (1.24-1.64)        | 1.17                        | (1.05-1.30)        | 1.25                 | (1.15-1.36)        |
| ≥10% of pre-surgery weight                   | 1.63                                                  | (1.19-2.25)        | 1.76                 | (1.46-2.12)        | 1.23                                                | (0.98-1.54)        | 1.42                 | (1.23-1.64)        | 1.18                        | (1.06-1.31)        | 1.25                 | (1.15-1.35)        |
| ≥10% of nadir weight                         | 1.37                                                  | (1.02-1.84)        | 1.62                 | (1.33-1.96)        | 1.14                                                | (0.92-1.42)        | 1.39                 | (1.20-1.60)        | 1.19                        | (1.07-1.32)        | 1.25                 | (1.15-1.36)        |
| ≥15% of nadir weight                         | 1.41                                                  | (1.03-1.92)        | 1.64                 | (1.37-1.97)        | 1.22                                                | (0.98-1.53)        | 1.36                 | (1.18-1.56)        | 1.16                        | (1.04-1.28)        | 1.23                 | (1.13-1.33)        |
| ≥10% of max weight lost                      | 1.42                                                  | (1.02-1.98)        | 1.72                 | (1.34-2.21)        | 1.12                                                | (0.88-1.43)        | 1.37                 | (1.16-1.61)        | <b>1.26</b>                 | <b>(1.11-1.43)</b> | <b>1.35</b>          | <b>(1.22-1.50)</b> |
| ≥20% of max weight lost                      | <b>1.64</b>                                           | <b>(1.22-2.19)</b> | <b>1.84</b>          | <b>(1.52-2.24)</b> | 1.27                                                | (1.02-1.57)        | <b>1.48</b>          | <b>(1.29-1.71)</b> | 1.20                        | (1.08-1.33)        | 1.28                 | (1.18-1.39)        |
| ≥25% of max weight lost                      | <b>1.64</b>                                           | <b>(1.21-2.20)</b> | 1.81                 | (1.50-2.17)        | 1.22                                                | (0.98-1.51)        | 1.47                 | (1.27-1.70)        | 1.20                        | (1.08-1.33)        | 1.27                 | (1.17-1.37)        |
|                                              | <b>Clinically important decline in physical HRQoL</b> |                    |                      |                    | <b>Clinically important decline in mental HRQoL</b> |                    |                      |                    |                             |                    |                      |                    |
|                                              | Primary analysis                                      |                    | Sensitivity analysis |                    | Primary analysis                                    |                    | Sensitivity analysis |                    |                             |                    |                      |                    |
|                                              | RR <sup>a</sup>                                       | (95% CI)           | RR <sup>a</sup>      | (95% CI)           | RR <sup>a</sup>                                     | (95% CI)           | RR <sup>a</sup>      | (95% CI)           |                             |                    |                      |                    |
| <b>Weight regain, continuous<sup>b</sup></b> |                                                       |                    |                      |                    |                                                     |                    |                      |                    |                             |                    |                      |                    |
| Weight in kg, per 9.1 kg                     | 1.21                                                  | (1.12-1.31)        | 1.25                 | (1.19-1.31)        | 1.08                                                | (1.00-1.17)        | 1.11                 | (1.05-1.17)        |                             |                    |                      |                    |
| BMI, per 3.2 kg/m <sup>2</sup>               | 1.21                                                  | (1.12-1.31)        | 1.25                 | (1.19-1.32)        | 1.09                                                | (1.01-1.18)        | 1.12                 | (1.06-1.18)        |                             |                    |                      |                    |
| % pre-surgery weight, per 6.9%               | 1.22                                                  | (1.12-1.32)        | 1.26                 | (1.20-1.33)        | <b>1.11</b>                                         | <b>(1.02-1.20)</b> | <b>1.13</b>          | <b>(1.07-1.20)</b> |                             |                    |                      |                    |
| % nadir weight, per 11.0%                    | 1.16                                                  | (1.07-1.25)        | 1.19                 | (1.14-1.25)        | 1.08                                                | (1.00-1.17)        | 1.11                 | (1.05-1.17)        |                             |                    |                      |                    |
| % max weight lost, per 18.9%                 | <b>1.28</b>                                           | <b>(1.18-1.38)</b> | <b>1.31</b>          | <b>(1.24-1.38)</b> | <b>1.11</b>                                         | <b>(1.02-1.20)</b> | <b>1.13</b>          | <b>(1.07-1.19)</b> |                             |                    |                      |                    |
| <b>Clinically important weight regain</b>    |                                                       |                    |                      |                    |                                                     |                    |                      |                    |                             |                    |                      |                    |
| ≥10 kg                                       | 1.39                                                  | (1.19-1.63)        | 1.53                 | (1.37-1.72)        | 1.12                                                | (0.96-1.30)        | 1.19                 | (1.07-1.34)        |                             |                    |                      |                    |
| ≥ 5 BMI points                               | 1.40                                                  | (1.18-1.65)        | 1.53                 | (1.36-1.72)        | <b>1.23</b>                                         | <b>(1.04-1.45)</b> | <b>1.26</b>          | <b>(1.12-1.42)</b> |                             |                    |                      |                    |
| ≥10% of pre-surgery weight                   | 1.45                                                  | (1.23-1.71)        | 1.53                 | (1.36-1.72)        | 1.17                                                | (1.00-1.38)        | 1.24                 | (1.11-1.39)        |                             |                    |                      |                    |
| ≥10% of nadir weight                         | 1.36                                                  | (1.15-1.59)        | 1.49                 | (1.32-1.68)        | 1.11                                                | (0.95-1.29)        | 1.20                 | (1.07-1.34)        |                             |                    |                      |                    |
| ≥15% of nadir weight                         | 1.36                                                  | (1.16-1.59)        | 1.45                 | (1.29-1.64)        | 1.19                                                | (1.01-1.39)        | 1.23                 | (1.10-1.38)        |                             |                    |                      |                    |
| ≥10% of max weight lost                      | 1.42                                                  | (1.17-1.72)        | 1.60                 | (1.38-1.87)        | 1.09                                                | (0.92-1.29)        | 1.16                 | (1.02-1.32)        |                             |                    |                      |                    |
| ≥20% of max weight lost                      | <b>1.55</b>                                           | <b>(1.33-1.82)</b> | <b>1.64</b>          | <b>(1.47-1.85)</b> | <b>1.23</b>                                         | <b>(1.06-1.43)</b> | 1.25                 | (1.12-1.39)        |                             |                    |                      |                    |
| ≥25% of max weight lost                      | 1.43                                                  | (1.22-1.68)        | 1.59                 | (1.42-1.79)        | 1.16                                                | (0.99-1.36)        | 1.23                 | (1.11-1.37)        |                             |                    |                      |                    |

eTable 8 continued

Abbreviations: BMI=body mass index; HRQoL=health-related quality of life; max=maximum; RR= Relative Risk. (Continued on next page)

<sup>a</sup>Adjusted for either glycosylated hemoglobin, low-density lipoprotein, systolic and diastolic blood pressure, the Short-Form 36 Physical Component Summary score, or the Short-Form 36 Mental Component Summary score at time of weight nadir, and time since weight nadir entered as a continuous fixed effect. The primary analysis also adjusted for pre-surgery factors related to missing data (i.e., site, age and smoking status). The highest RR among each set of regain variables is in bold type.

<sup>b</sup>For continuous variables, RR is reported per median weight regain across post-nadir time points.



**eTable 9.** A comparison of model fits, as measured by Bayesian Information Criterion (BIC) values, between models with continuous vs. dichotomous weight regain measures<sup>a</sup> (N=1286)

|                                             | Progression of diabetes <sup>b</sup><br>N=689                              |        |      |                         | Progression of hyperlipidemia <sup>a</sup><br>N=539                      |         |      |                         | Progression of hypertension <sup>b</sup><br>N=956                        |        |      |                         |
|---------------------------------------------|----------------------------------------------------------------------------|--------|------|-------------------------|--------------------------------------------------------------------------|---------|------|-------------------------|--------------------------------------------------------------------------|--------|------|-------------------------|
|                                             | Cont                                                                       | Dich   | Diff | Better Fit <sup>b</sup> | Cont                                                                     | Dich    | Diff | Better Fit <sup>b</sup> | Cont                                                                     | Dich   | Diff | Better Fit <sup>b</sup> |
| <b>Continuous vs. dichotomous</b>           |                                                                            |        |      |                         |                                                                          |         |      |                         |                                                                          |        |      |                         |
| Weight in kg vs. ≥10 kg                     | 1543.2                                                                     | 1549.4 | 6.2  | Cont                    | 2050.9                                                                   | 2049.4  | -1.5 | -                       | 5631.9                                                                   | 5636.3 | 4.4  | Cont                    |
| BMI (kg/m <sup>2</sup> ) vs. ≥ 5 BMI points | 1543.2                                                                     | 1548.6 | 5.4  | Cont                    | 2050.8                                                                   | 2052.4  | 1.6  | -                       | 5632.1                                                                   | 5637.8 | 5.7  | Cont                    |
| % pre-surgery weight vs. ≥10%               | 1541.9                                                                     | 1549.5 | 7.6  | Cont                    | 2051.7                                                                   | 2052.2  | 0.5  | -                       | 5630.8                                                                   | 5636.8 | 6.0  | Cont                    |
| % nadir weight vs. ≥10%                     | 1545.5                                                                     | 1553.2 | 7.7  | Cont                    | 2051.54                                                                  | 2053.52 | 1.98 | -                       | 5634.9                                                                   | 5635.2 | 0.3  | -                       |
| % nadir weight vs. ≥15%                     | 1545.5                                                                     | 1554.0 | 8.5  | Cont                    | 2051.5                                                                   | 2052.0  | 0.5  | -                       | 5634.9                                                                   | 5638.4 | 3.5  | Cont                    |
| % max weight lost vs. ≥10%                  | 1535.8                                                                     | 1554.0 | 18.2 | Cont                    | 2052.8                                                                   | 2054.9  | 2.1  | Cont                    | 5627.9                                                                   | 5631.8 | 3.9  | Cont                    |
| % max weight lost vs. ≥20%                  | 1535.8                                                                     | 1547.2 | 11.4 | Cont                    | 2052.8                                                                   | 2050.6  | -2.2 | Dich                    | 5627.9                                                                   | 5634.1 | 6.2  | Cont                    |
| % max weight lost vs. ≥25%                  | 1535.8                                                                     | 1547.3 | 11.5 | Cont                    | 2052.8                                                                   | 2052.1  | -0.7 | -                       | 5627.9                                                                   | 5634.1 | 6.2  | Cont                    |
| Best vs. Best <sup>c</sup>                  | 1535.8                                                                     | 1547.2 | 11.4 | Cont                    | 2050.8                                                                   | 2049.4  | -1.3 | -                       | 5627.9                                                                   | 5631.8 | 3.9  | Cont                    |
|                                             | <b>Clinically important decline in physical HRQoL<sup>b</sup></b><br>N=903 |        |      |                         | <b>Clinically important decline in mental HRQoL<sup>a</sup></b><br>N=903 |         |      |                         | <b>Clinically important decline in satisfaction<sup>c</sup></b><br>N=272 |        |      |                         |
|                                             | Cont                                                                       | Dich   | Diff | Better Fit <sup>a</sup> | Cont                                                                     | Dich    | Diff | Better Fit <sup>b</sup> | Cont                                                                     | Dich   | Diff | Better Fit <sup>b</sup> |
| Weight in kg vs. ≥10 kg                     | 3541.9                                                                     | 3548.0 | 6.1  | Cont                    | 3739.2                                                                   | 3741.9  | 2.7  | Cont                    | 584.4                                                                    | 585.3  | 0.9  | -                       |
| BMI (kg/m <sup>2</sup> ) vs. ≥ 5 BMI points | 3542.8                                                                     | 3550.2 | 7.4  | Cont                    | 3738.5                                                                   | 3737.3  | -1.2 | -                       | 583.3                                                                    | 586.9  | 3.6  | Cont                    |
| % pre-surgery weight vs. ≥10%               | 3544.1                                                                     | 3544.4 | 0.3  | -                       | 3737.7                                                                   | 3739.6  | 1.9  | Cont                    | 585.5                                                                    | 588.1  | 2.6  | Cont                    |
| % nadir weight vs. ≥10%                     | 3551.2                                                                     | 3552.0 | 0.8  | -                       | 3738.8                                                                   | 3741.0  | 2.2  | Cont                    | 586.9                                                                    | 586.5  | -0.4 | -                       |
| % nadir weight vs. ≥15%                     | 3551.2                                                                     | 3550.3 | -0.9 | -                       | 3738.8                                                                   | 3739.6  | 0.8  | -                       | 586.9                                                                    | 589.8  | 2.9  | Cont                    |
| % max weight lost vs. ≥10%                  | 3532.8                                                                     | 3550.4 | 17.6 | Cont                    | 3737.6                                                                   | 3742.2  | 4.6  | Cont                    | 582.9                                                                    | 582.9  | 0.0  | Cont                    |
| % max weight lost vs. ≥20%                  | 3532.8                                                                     | 3535.5 | 2.7  | Cont                    | 3737.6                                                                   | 3735.8  | -1.8 | -                       | 582.9                                                                    | 579.4  | -3.5 | Dich                    |
| % max weight lost vs. ≥25%                  | 3532.8                                                                     | 3546.5 | 13.7 | Cont                    | 3737.6                                                                   | 3739.9  | 2.3  | Cont                    | 582.9                                                                    | 575.9  | -7.0 | Dich                    |
| Best vs. Best <sup>c</sup>                  | 3532.8                                                                     | 3535.5 | 2.7  | Cont                    | 3737.6                                                                   | 3735.8  | -1.8 | -                       | 582.9                                                                    | 575.9  | -7.0 | Dich                    |

Abbreviations: Cont=continuous; Dich=dichotomous; HRQoL=health-related quality of life; max=maximum.

<sup>a</sup> Relative risks with 95% confidence intervals and *p*-values from associations are presented in Table 3 and eTable 6.

<sup>b</sup> Given equivalent model complexities, a difference of more than 2 is considered good evidence that the model with the lower BIC has better fit. Weight regain measures are considered to perform similarly if the difference in BICs is ≤2.

<sup>c</sup> The best continuous measure vs. the best dichotomous measure. Within type of measures (i.e., continuous or dichotomous), measures were considered to perform similarly if the difference in BICs was ≤2, or the model fit was better with one measure, while the magnitude of the association was larger with another. When measures within type tied for “best” using these criteria, the measure with the lowest BIC was selected for comparison across type (i.e. best continuous measure vs. the best dichotomous).
